# Supplementary material for: NADPH oxidase exerts a B cell–intrinsic contribution to lupus risk by modulating endosomal TLR signals
Source: PubMed Central journal article supplement — J Exp Med. 2024 Mar 5;221(4):e20230774. doi: 10.1084/jem.20230774 (PMC10913815; doi:10.1084/jem.20230774), 2024-03-05
Supplement: JEM_20230774_SourceDataF6.pdf [file JEM_20230774_SourceDataF6.pdf]

Figure 6E

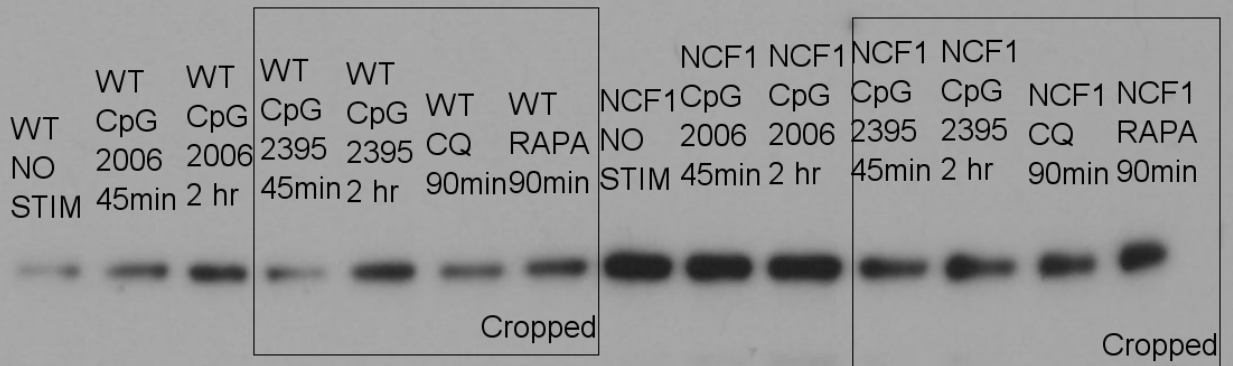

CQ: Chloroquine  
RAPA: Rapamycin

LSD1 labeled WB.pdf

1856 x 1412

Figure 6E

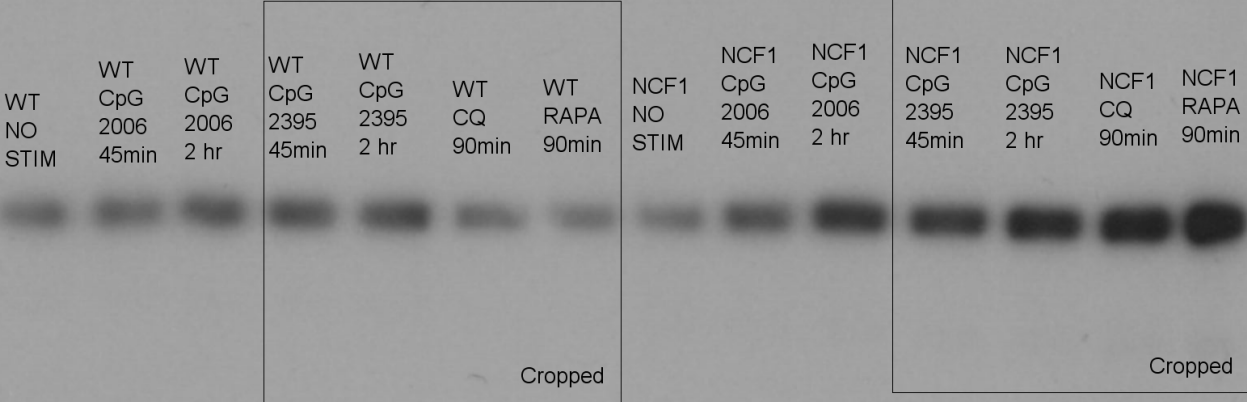

CQ: Chloroquine  
RAPA: Rapamycin
