# Supplementary material for: NADPH oxidase exerts a B cell–intrinsic contribution to lupus risk by modulating endosomal TLR signals
Source: PubMed Central journal article supplement — J Exp Med. 2024 Mar 5;221(4):e20230774. doi: 10.1084/jem.20230774 (PMC10913815; doi:10.1084/jem.20230774), 2024-03-05
Supplement: JEM_20230774_SourceDataFS3.pdf [file JEM_20230774_SourceDataFS3.pdf]

Supplemental Figure 3B

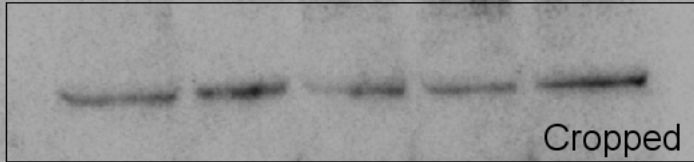

NCF1

Parent NCF1 NCF1 NCF1 NCF1  
HBL1 KO KO KO KO  
Clone1 Clone2 Clone3 Clone4

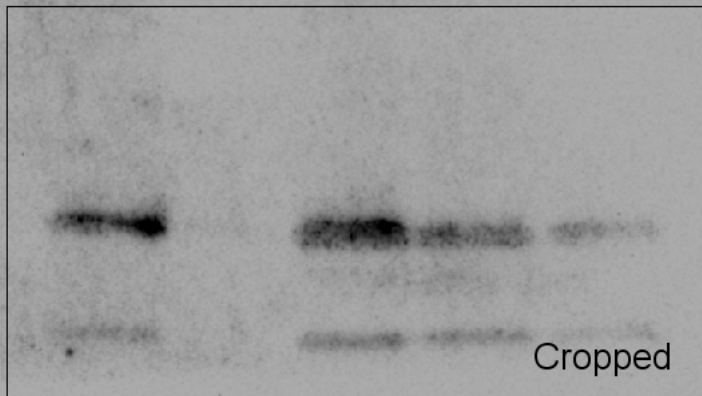

Supplemental Figure 3B

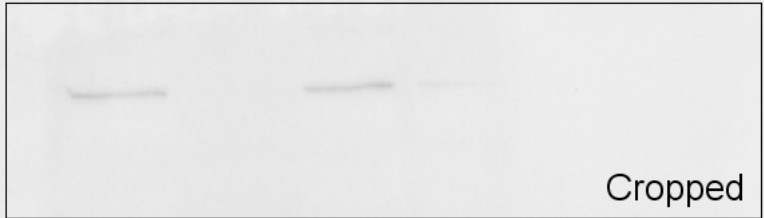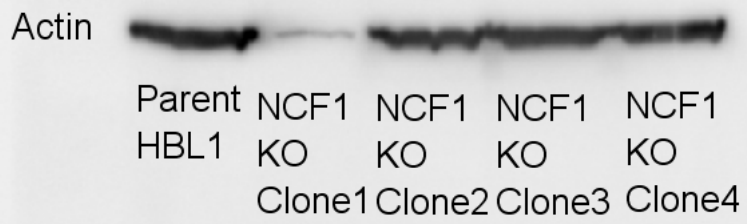

Supplemental Figure 3C

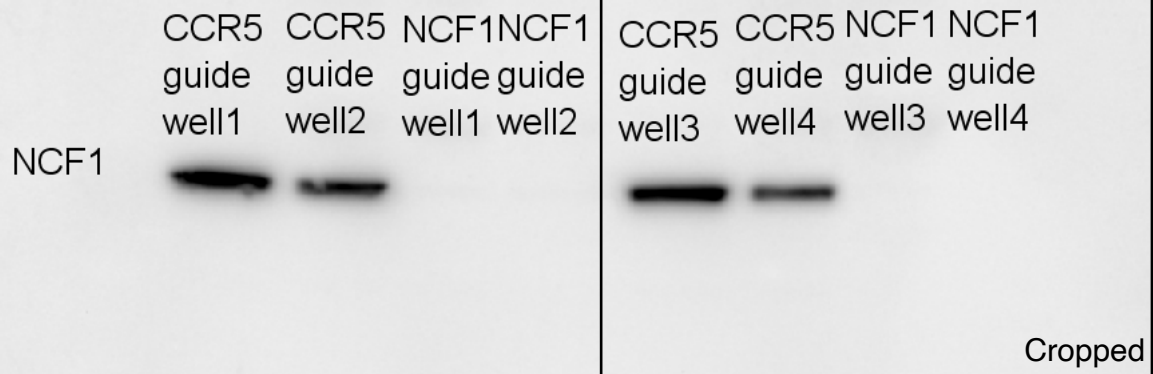

Supplemental Figure 3C

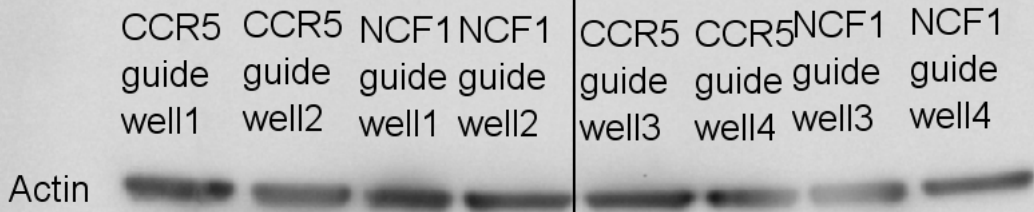

LC3 labeled WB.pdf

1122 x 897

Supplemental Figure 3F

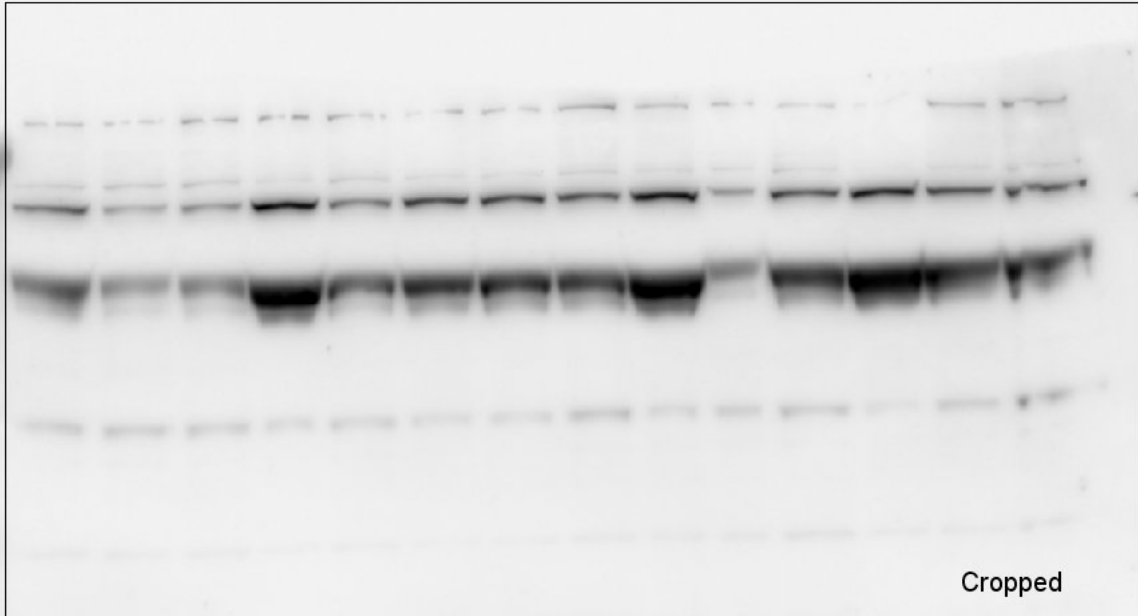

|      |       |       |       |       |       |       |      |       |       |       |       |       |       |       |
|------|-------|-------|-------|-------|-------|-------|------|-------|-------|-------|-------|-------|-------|-------|
| WT   | WT    | WT    | WT    | WT    | WT    | WT    | NCF1 | NCF1  | NCF1  | NCF1  | NCF1  | NCF1  | NCF1  | NCF1  |
| NO   | CpG   | CpG   | CpG   | CpG   | RAPA  | CQ    | NO   | CpG   | CpG   | CpG   | CpG   | CpG   | CQ    | RAPA  |
| STIM | 10min | 45min | 60min | 90min | 90min | 90min | STIM | 10min | 45min | 60min | 90min | 90min | 90min | 90min |

LC3II

CpG: CpG2395  
RAPA: Rapamycin  
CQ: Chloroquine

B-ACTIN labeled WB.pdf

1122 x 897

Supplemental Figure 3F

|      |       |       |       |       |       |       |      |       |       |       |       |       |       |
|------|-------|-------|-------|-------|-------|-------|------|-------|-------|-------|-------|-------|-------|
| WT   | WT    | WT    | WT    | WT    | WT    | WT    | NCF1 | NCF1  | NCF1  | NCF1  | NCF1  | NCF1  | NCF1  |
| NO   | CpG   | CpG   | CpG   | CpG   | RAPA  | CQ    | NO   | CpG   | CpG   | CpG   | CpG   | CQ    | RAPA  |
| STIM | 10min | 45min | 60min | 90min | 90min | 90min | STIM | 10min | 45min | 60min | 90min | 90min | 90min |

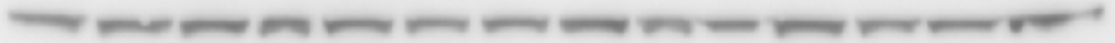

CpG: CpG2395  
RAPA: Rapamycin  
CQ: Chloroquine

p62 labeled WB.pdf

1122 x 897

Supplemental Figure 3H

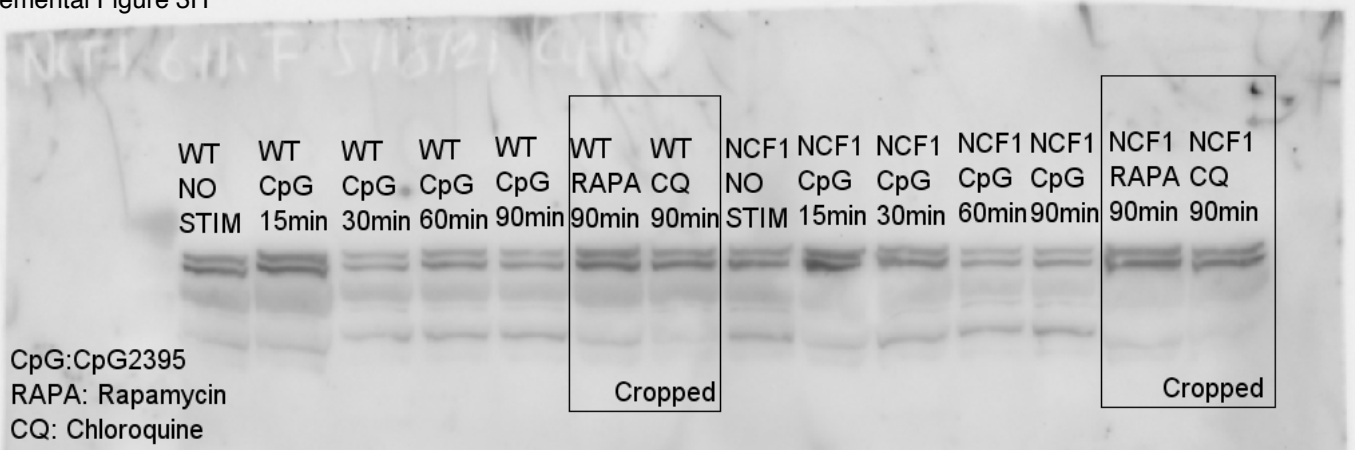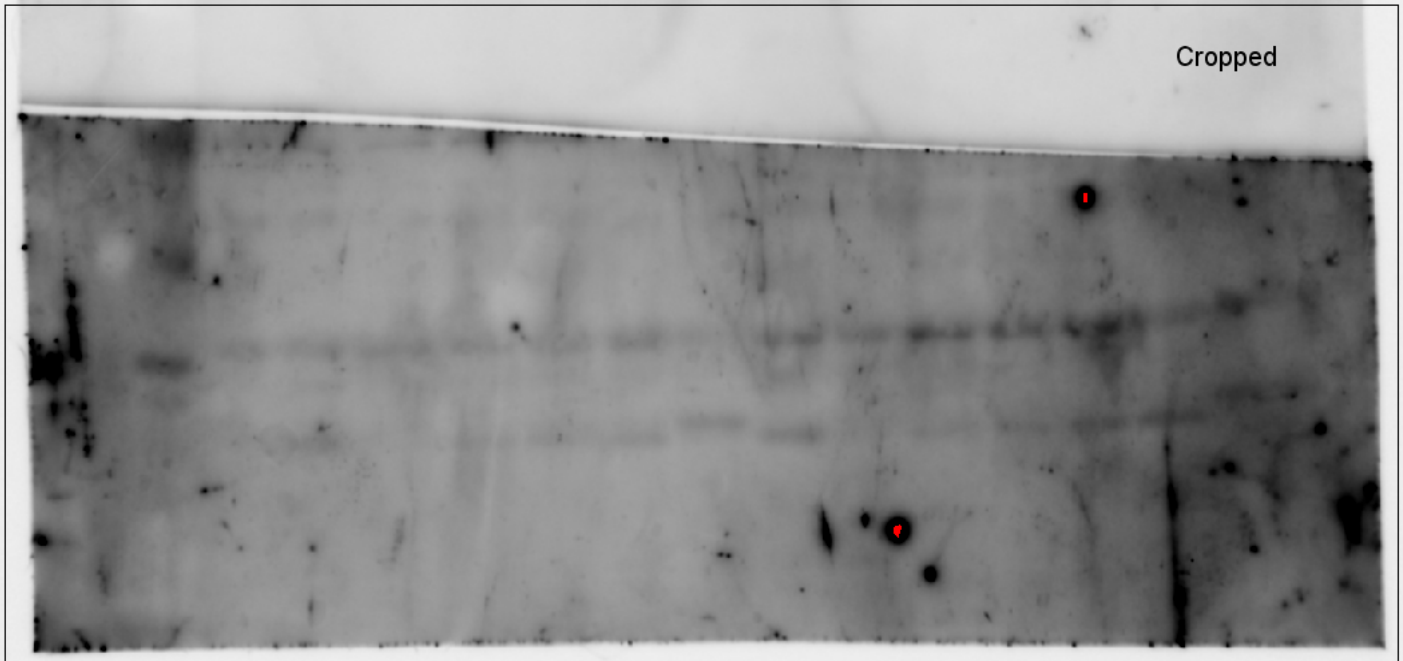

Supplemental Figure 3H

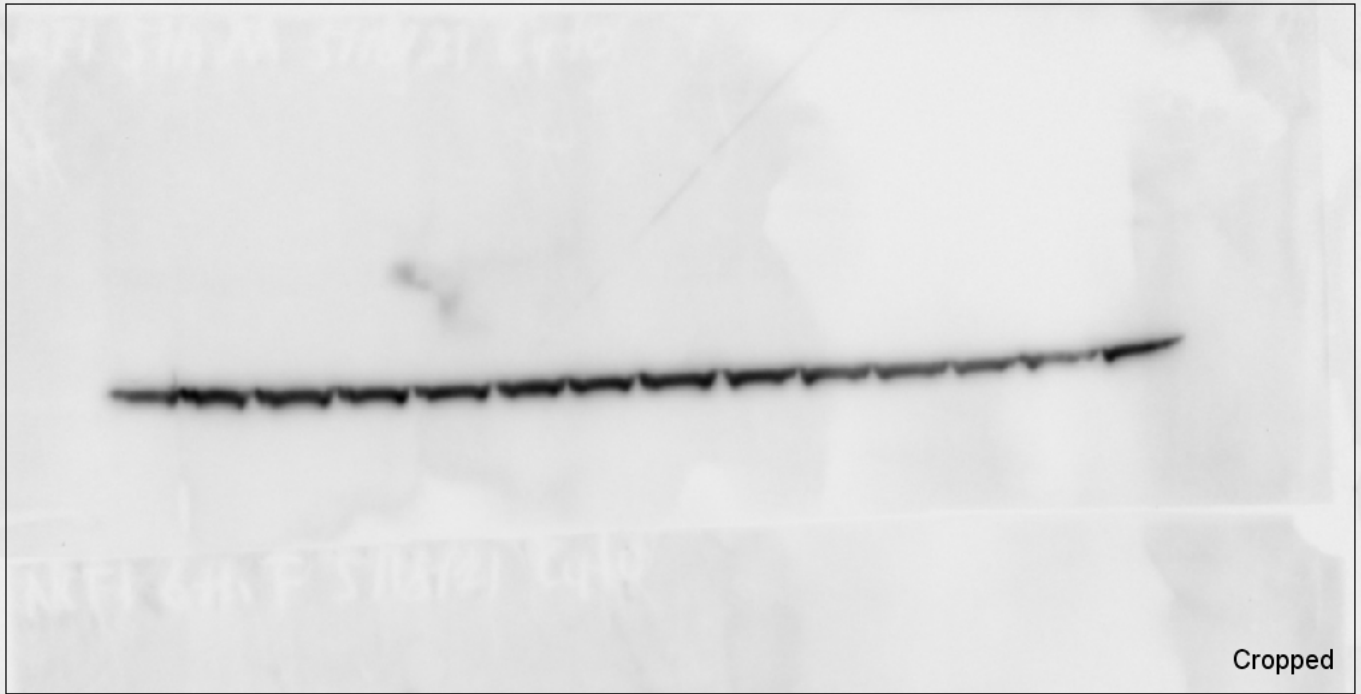

|      |       |       |       |       |       |       |      |       |       |       |       |       |       |      |
|------|-------|-------|-------|-------|-------|-------|------|-------|-------|-------|-------|-------|-------|------|
| WT   | WT    | WT    | WT    | WT    | WT    | WT    | NCF1 | NCF1  | NCF1  | NCF1  | NCF1  | NCF1  | NCF1  | NCF1 |
| NO   | CpG   | CpG   | CpG   | CpG   | RAPA  | CQ    | NO   | CpG   | CpG   | CpG   | CpG   | RAPA  | CQ    |      |
| STIM | 15min | 30min | 60min | 90min | 90min | 90min | STIM | 15min | 30min | 60min | 90min | 90min | 90min |      |

CpG: CpG2395  
RAPA: Rapamycin  
CQ: Chloroquine

Cropped

Cropped
