# Supplementary figures and images for: NADPH oxidase exerts a B cell–intrinsic contribution to lupus risk by modulating endosomal TLR signals
Source: PubMed Central journal article supplement — J Exp Med. 2024 Mar 5;221(4):e20230774. doi: 10.1084/jem.20230774 (PMC10913815; doi:10.1084/jem.20230774), 2024-03-05

Figure 5E

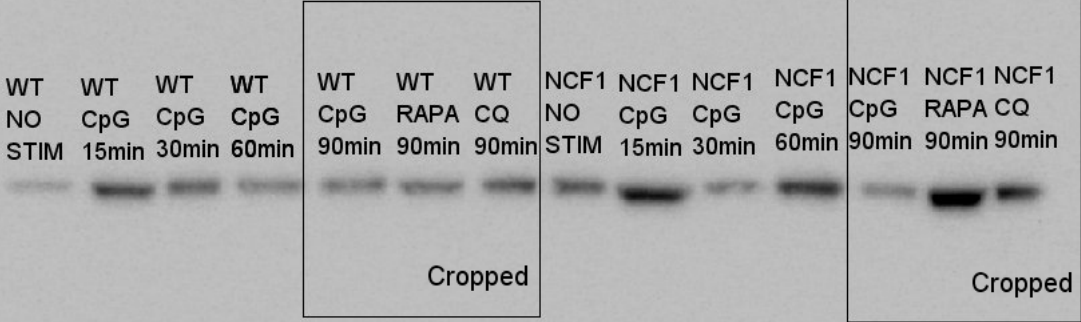

CpG: CpG2395  
RAPA: Rapamycin  
CQ: Chloroquine

Figure 5E

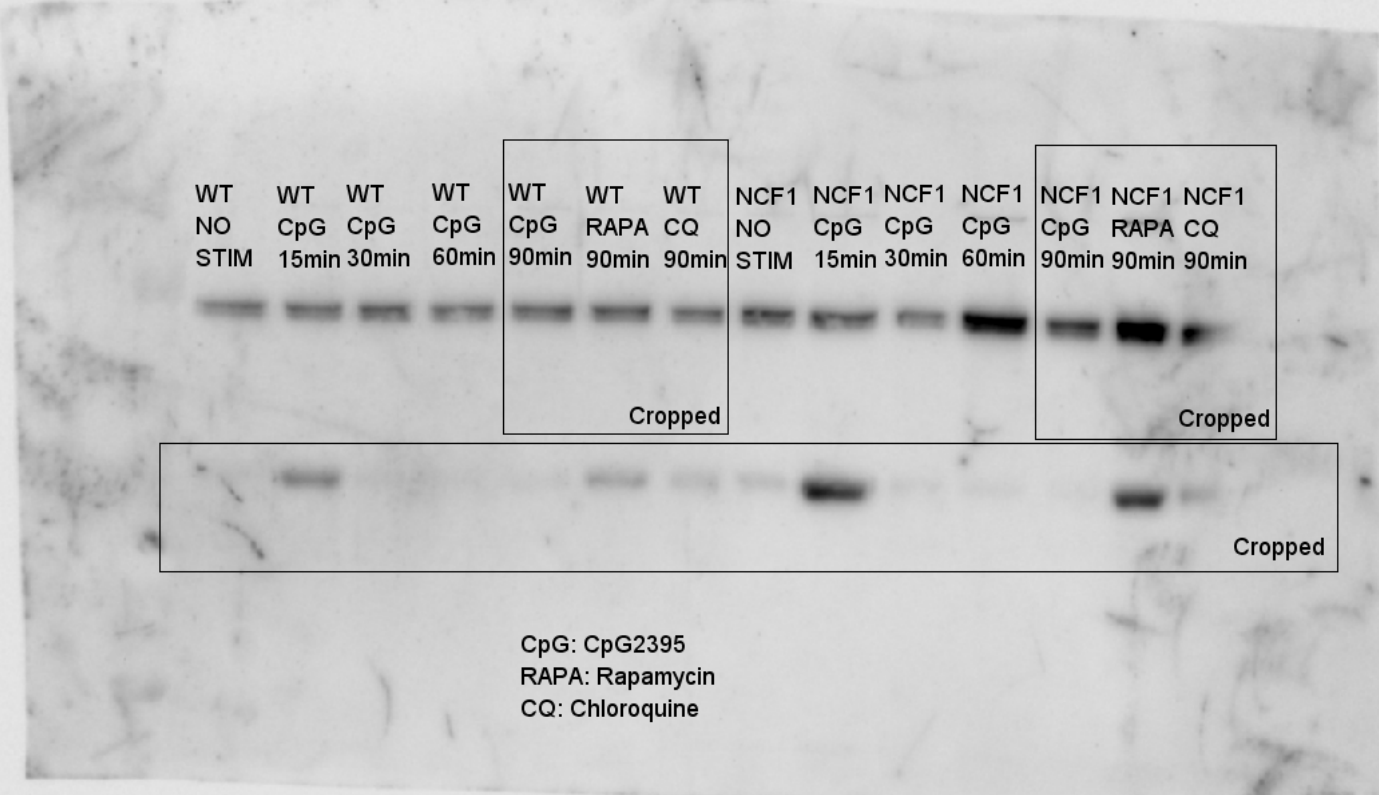

Figure 5G

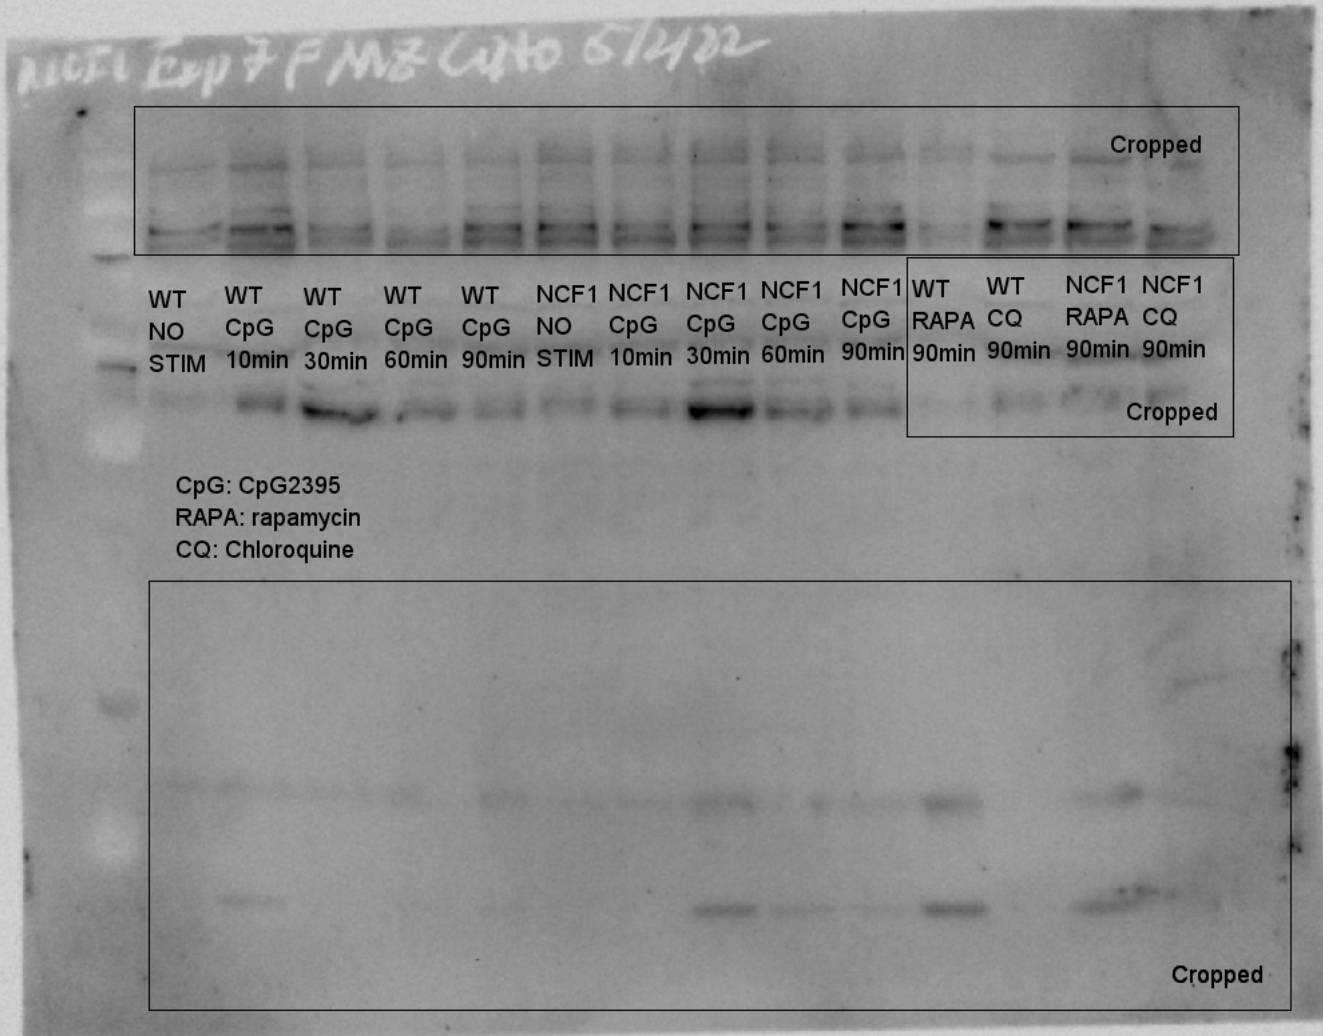

Figure 5G

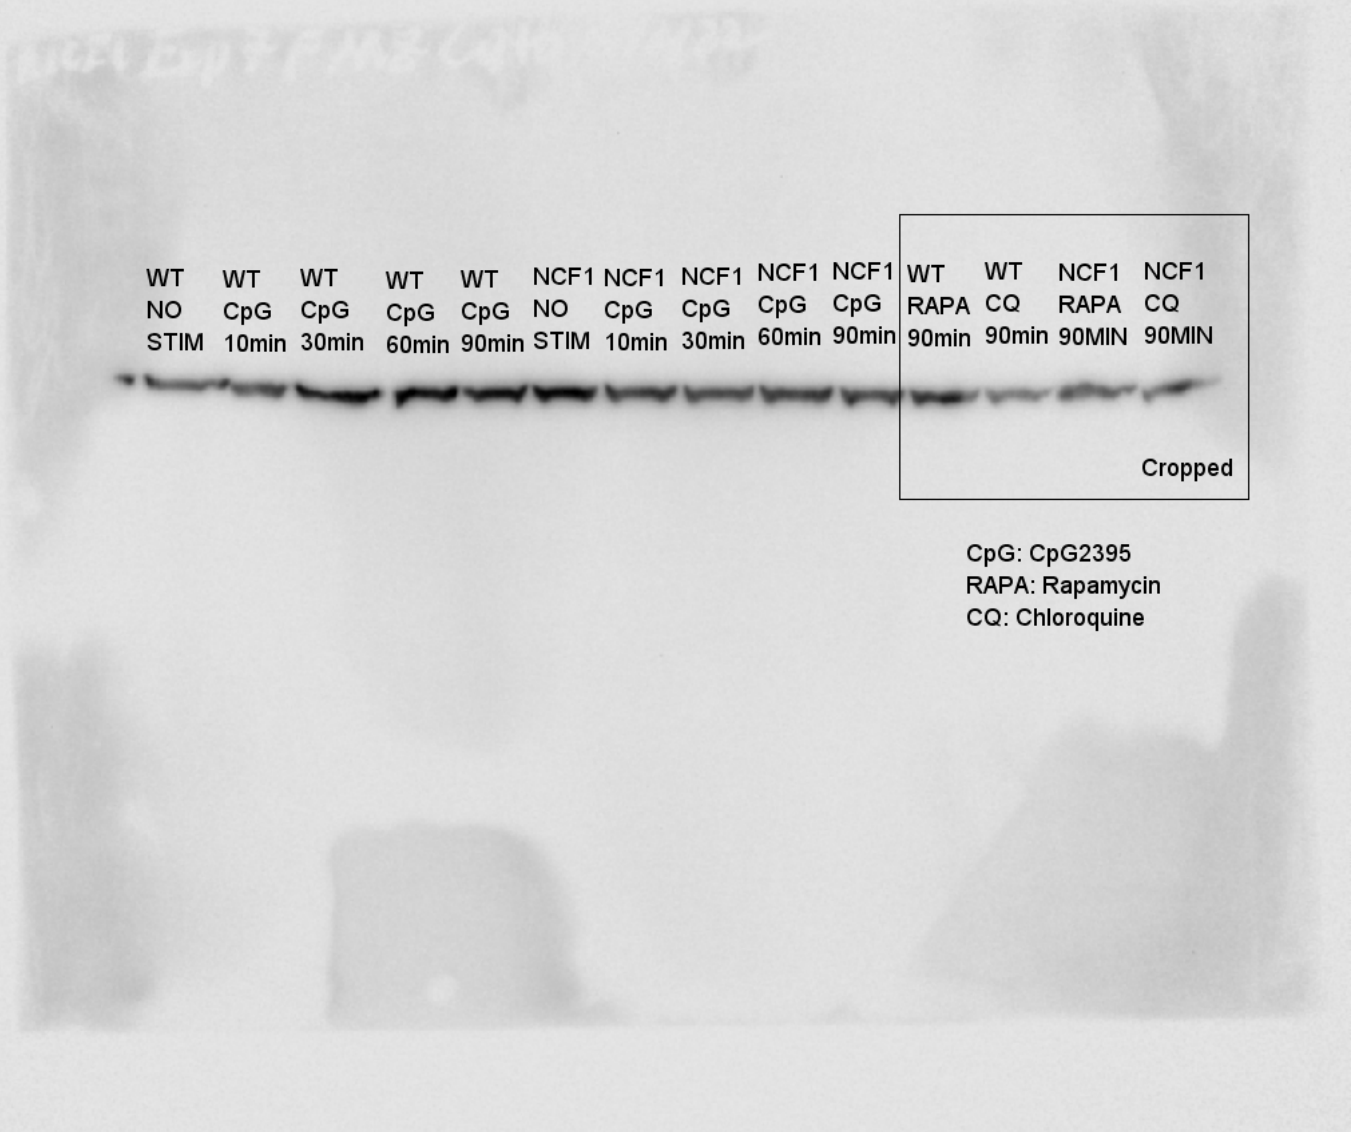

Supplement: JEM_20230774_SourceDataF5.pdf [file JEM_20230774_SourceDataF5.pdf]
